# Supplementary material for: Sustained low‐dose interleukin‐2 therapy alleviates pathogenic humoral immunity via elevating the Tfr/Tfh ratio in lupus
Source: PubMed Central journal article supplement — Clin Transl Immunology. 2021 Jun 1;10(6):e1293. doi: 10.1002/cti2.1293 (PMC8169300; doi:10.1002/cti2.1293), 2021-06-01
Supplement: CTI2-10-e1293-s001.pdf [file CTI2-10-e1293-s001.pdf]

## Sustained low-dose IL-2 therapy alleviates pathogenic humoral immunity *via* elevating the Tfr/Tfh ratio in lupus

### Supplementary information

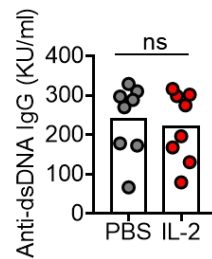

**Supplementary figure 1.** Anti-dsDNA IgG was remained unaltered in NZB/W mice with short treatment of IL-2. ELISA measurement of anti-dsDNA IgG titer in the serum of NZB/W F1 mice with short treatment regimen of low-dose IL-2 therapy or PBS for 7 days. Data are shown for individual (dots,  $n = 8$ ) and mean (bars) values. Data are representative of three independent experiments and analysed by the Student's unpaired  $t$ -test. ns:  $P > 0.05$ .

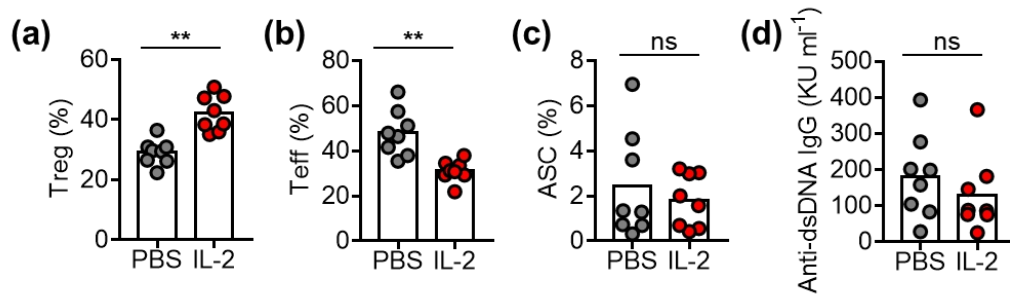

**Supplementary figure 2.** Medium treatment regimen of low-dose IL-2 therapy increased Treg cell, reduced Teffs, but not ASC and anti-dsDNA titers in female NZB/W F1 mice. The frequencies of **(a)** Treg cells, **(b)** Teff cells and **(c)** ASC in spleens of NZB/W F1 mice with 14 days of PBS or IL-2 treatment. **(d)** ELISA measurement of anti-dsDNA IgG titer in the serum of NZB/W F1 mice with 14 days of PBS or IL-2 treatment. Data are shown for individual (dots,  $n = 8$ ) and mean (bars) values. Data are representative of three independent experiments. and analysed by the Student's unpaired  $t$ -test or the Mann-Whitney  $U$ -test. \*\*:  $P < 0.01$ .

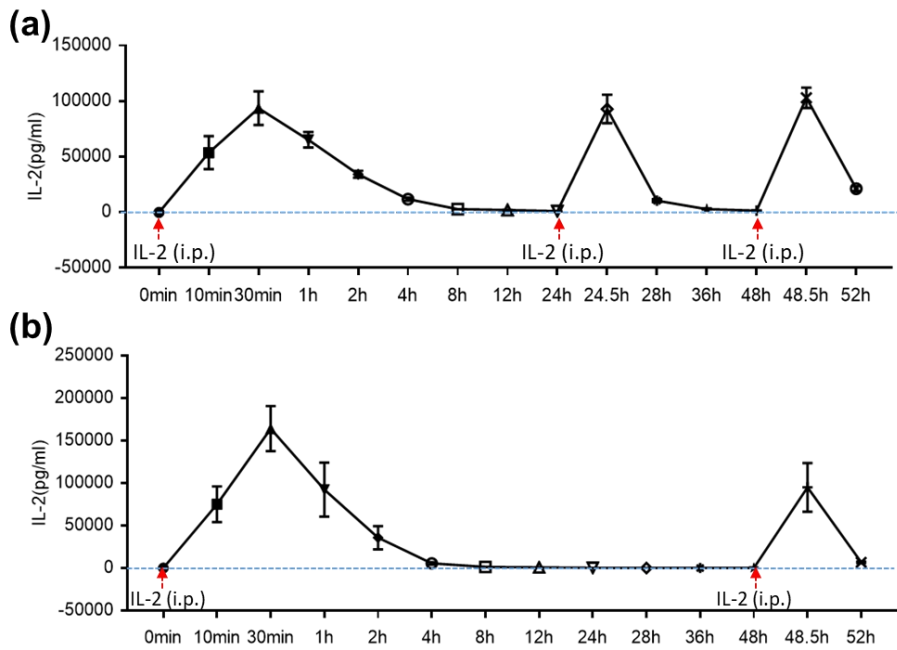

**Supplementary figure 3.** Pharmacokinetics of recombinant human interleukin-2 following intraperitoneal administration. **(a, b)**, Kinetics of serum IL-2 in female NZB/W F1 mice with daily (0, 24 and 48 hours) **(a)** or every two days of IL-2 injection (0 and 48 hours) **(b)**. F1 mice (20 weeks of age,  $n = 4$ ) were intraperitoneally injected with  $3 \times 10^4$  IU IL-2, and ELISA measurement of serum IL-2 at indicated time point (0, 10, 30 minutes, 1, 2, 4, 8, 12, 24, 24.5, 28, 36, 48, 48.5 and 52 hours). Data are representative of three independent experiments.

**Supplementary table 1.** Reanalysis of previous clinical trial data (NCT02084238, He *et al.* *Nat Med* 2016) - Baseline characteristics of patients with SLE receiving low-dose rhIL-2 (n = 23)

| <b>Characteristic</b>                       | <b>Value</b> |
|---------------------------------------------|--------------|
| Age, year, median (range)                   | 35 (18-60)   |
| Female/Male                                 | 22/1         |
| Duration of SLE, year, median (range)       | 5 (0.5-15)   |
| Prednisone dose, mg per day, median (range) | 45 (0-50)    |
| Use of concomitant agents (no. of patients) |              |
| Hydroxychloroquine                          | 20           |
| Cyclophosphamide                            | 4            |
| Azathioprine                                | 1            |
| Cyclosporine                                | 0            |
| Methotrexate                                | 0            |
| Mycophenolate mofetil                       | 8            |
| Leflunomide                                 | 1            |
| Thalidomide                                 | 0            |

**Supplementary table 2.** Reanalysis of previous clinical trial data (NCT02084238, He *et al.* *Nat Med* 2016) - Clinical characteristics of patients before and after low-dose IL-2 therapy (n = 23)

| <b>Characteristics</b>                           | <b>Baseline</b>    | <b>week 12</b>     | <b>P value</b> |
|--------------------------------------------------|--------------------|--------------------|----------------|
| SELENA-SLEDAI, median (range)                    | 10 (8-23)          | 4 (0-12)           | <0.001         |
| Rash, n (%)                                      | 15 (65.2)          | 3 (13.04)          | <0.001         |
| Alopecia, n (%)                                  | 9 (39.1)           | 0 (0)              | 0.002          |
| Arthritis, n (%)                                 | 8 (34.8)           | 1 (4.3)            | 0.022          |
| Leukopenia, n (%)                                | 7 (30.4)           | 1 (4.34)           | 0.047          |
| C3, g L <sup>-1</sup> , median (range)           | 0.495 (0.274-1.46) | 0.799 (0.548-1.13) | <0.001         |
| C4, g L <sup>-1</sup> , median (range)           | 0.084 (0.016-0.54) | 0.16 (0.089-0.32)  | <0.001         |
| Anti-dsDNA, IU mL <sup>-1</sup> , median (range) | 442.3 (71-3987.5)  | 230.5 (10-2413.2)  | 0.003          |

**Supplementary table 3.** Demographic and clinical characteristics of SLE patients (n = 16)

| <b>Characteristics</b>                             | <b>Value</b>       |
|----------------------------------------------------|--------------------|
| Age, year, median (range)                          | 37.5(24-61)        |
| Female/Male                                        | 16/0               |
| WBC, $\times 10^9 \text{ L}^{-1}$ , median (range) | 5 (2.85-9.92)      |
| Positive ANA, n (%)                                | 7 (44)             |
| Anti-dsDNA, IU $\text{mL}^{-1}$ , median (range)   | 33.25 (21.9-181.9) |
| Positive anti-Sm antibodies, n (%)                 | 7 (44)             |
